# Supplementary material for: Financing Multiple Heterogeneous Suppliers in Assembly Systems: Buyer Finance vs. Bank Finance
Source: Atypon-hosted journal article supplement (doi:10.1287/msom.2017.0677), 2018-01-29
Supplement: msom.2017.0677-sm.pdf [file msom.2017.0677-sm.pdf]

## Appendix: Online Supplements

This appendix include all proofs and additional properties for “**Financing Multiple Heterogeneous Suppliers in Assembly Systems: Buyer Finance versus Bank Finance**” by Shiming Deng, Chaocheng Gu, Gangshu (George) Cai, and Yanhai Li, published by *Manufacturing & Service Operations Management*.

**Proof of Lemma 2:** We prove this lemma by contradiction. Given the equilibrium  $\vec{w}$ , let  $q_m = \min\{\bar{F}^{-1}(\frac{c^j(1+r_s^j)}{w^j}), j = 1, \dots, N\}$ . Suppose that, in the equilibrium solution,  $\bar{F}^{-1}(\frac{c^i(1+r_s^i)}{w^i}) > q_m$  for some supplier  $i$ . Note that the assembler’s expected profit is  $\Pi_n(q) = \mathbf{E}_D [(p - \sum_{i=1}^N w^i) \cdot \min(D, q)]$ . We can improve  $\Pi_n(q)$  by keeping  $q$  and  $(w^1, \dots, w^{i-1}, w^{i+1}, \dots, w^N)$  unchanged but lowering  $w^i$  so that  $\bar{F}^{-1}(\frac{c^i(1+r_s^i)}{w^i}) = q_m$ . The assembler incurs a lower purchasing cost for component  $i$  and receives a higher profit. This contradicts the assumption that  $\vec{w}$  is optimal for the assembler. Therefore, we have  $q = \bar{F}^{-1}(\frac{c^i(1+r_s^i)}{w^i}), \forall i$ . Similarly, if there exists some supplier  $i$  such that  $\bar{F}^{-1}(\frac{c^i(1+r_s^i)}{w^i}) > \min_i\{\frac{k^i}{c^i}\}$ , then  $\Pi_n(q)$  can be improved by lowering  $w^i$  but keeping  $q$  and  $(w^1, \dots, w^{i-1}, w^{i+1}, \dots, w^N)$  unchanged. Therefore, in the equilibrium solution, we have  $\bar{F}^{-1}(\frac{c^i(1+r_s^i)}{w^i}) \leq \min_i\{\frac{k^i}{c^i}\}, \forall i$ . Following the same argument, we can show that the equilibrium  $q$  cannot be less than  $q_m$  and must be equal to  $q_m$ . Q.E.D.

**Proof of Lemma 3:** The first order derivative of  $\Pi_n(q)$  with respect to  $q$  is  $\frac{\partial \Pi_n(q)}{\partial q} = -\frac{f(q) \sum_{i=1}^N \frac{c^i(1+r_s^i)}{[F(q)]^2} \int_0^q \bar{F}(x) dx + p\bar{F}(q) - \sum_{i=1}^N c^i(1+r_s^i)}{[F(q)]^2}$ . Following the IFR assumption,  $\frac{f(q)}{F(q)}$  increases with  $q$ . Note that  $\int_0^q \bar{F}(x) dx$  increases with  $q$  and  $\bar{F}(q)$  decreases with  $q$ . Therefore,  $\frac{\partial \Pi_n(q)}{\partial q}$  is decreasing in  $q$ . Thus,  $\Pi_n(q)$  is concave in  $q$ . Q.E.D.

**Proof of Lemma 4:** Let  $w_{(1)}^i = c^i(1+r_s^i)/\bar{F}(\frac{k^i}{c^i})$  and  $w_{(2)}^i = c^i(1+r_f)/\bar{F}(\frac{k^i}{c^i})$ . Suppose there exists  $w_0^i \leq w_{(2)}^i$ , when  $w^i = w_0^i$ , supplier  $i$  borrows  $B^i > 0$  and produces  $q_0^i > \frac{k^i}{c^i}$ . Then the optimal quantity  $q_0^i = \bar{F}^{-1}(\frac{c^i(1+r_f)}{w_0^i}) > \frac{k^i}{c^i}$ , which implies  $w_0^i > c^i(1+r_f)/\bar{F}(\frac{k^i}{c^i}) = w_{(2)}^i$ , this contradicts the definition of  $w_0^i$ . Therefore,  $B^i = 0$  (i.e.  $q^i \leq \frac{k^i}{c^i}$ ) if  $w^i \leq w_{(2)}^i$ .

(1) When  $w^i < w_{(1)}^i$ , because  $w_{(1)}^i \leq w_{(2)}^i$ , it follows the above statement that  $B^i = 0$ . The supplier  $i$ ’s profit is  $\pi_{bk}^i = \mathbf{E}_D[w^i \min(q^i, D)] + (k^i - c^i q^i)(1+r_s^i)$ , subject to  $c^i q^i \leq k^i$ . The optimal quantity  $q^i = \min(\frac{k^i}{c^i}, \bar{F}^{-1}(\frac{c^i(1+r_s^i)}{w^i})) = \bar{F}^{-1}(\frac{c^i(1+r_s^i)}{w^i})$ .

(2) We have shown  $q^i \leq \frac{k^i}{c^i}$  if  $w^i \leq w_{(2)}^i$ . To prove  $q^i = \frac{k^i}{c^i}$  when  $w_{(1)}^i < w^i \leq w_{(2)}^i$ , we next need to show  $q^i < \frac{k^i}{c^i}$  is not optimal. Suppose there exists  $w_0^i \in [w_{(1)}^i, w_{(2)}^i)$ , when  $w^i = w_0^i$ , supplier  $i$  produces  $q_0^i < \frac{k^i}{c^i}$ . Then the optimal quantity  $q_0^i = \bar{F}^{-1}(\frac{c^i(1+r_s^i)}{w_0^i}) < \frac{k^i}{c^i}$ , which implies

$w_0^i < c^i(1 + r_s^i)/\bar{F}(\frac{k^i}{c^i}) = w_{(1)}^i$ , this contradicts the definition of  $w_0^i$ .

(3) When  $w^i > w_{(2)}^i$ , we next prove  $B^i = 0$  (i.e.,  $q^i \leq \frac{k^i}{c^i}$ ) is not optimal. Assume  $B^i = 0$ , the optimal quantity of supplier  $i$  is  $q^i = \bar{F}^{-1}(\frac{c^i(1+r_s^i)}{w^i}) > \bar{F}^{-1}(\frac{c^i(1+r_f)}{w_{(2)}^i}) = k^i/c^i$ , which contradicts the assumption that  $B^i = 0$ . Q.E.D.

**Proof of Lemma 5:** The proof follows the same argument for Lemma 2. Q.E.D.

**Proof of Theorem 1:**

1. For any supplier  $i$ , by definition,  $\Pi_{bk}$  is left-continuous at  $q = \frac{k^i}{c^i}$ . We next show that  $\Pi_{bk}$  is not right-continuous at  $q = \frac{k^i}{c^i}$ . Note that for each  $q = \frac{k^i}{c^i}$ , the right-hand limit is  $\Pi_{bk}^+(q) = \lim_{q \rightarrow (\frac{k^i}{c^i})^+} \Pi_{bk}(q) = \{p - \frac{\sum_{j=i+1}^N c^j + \sum_{j=1}^i (1+r_f)c^j}{\bar{F}(q)}\} \cdot \mathbf{E}_{\mathbf{D}} \min(q, D)$ , so  $\Pi_{bk}^+(q) - \Pi_{bk}^- = -\frac{c^i r_f}{\bar{F}(q)} \cdot \mathbf{E}_{\mathbf{D}} \min(q, D) < 0$ . Therefore,  $q = \frac{k^i}{c^i}$  is a breakpoint for  $\forall i \in \{1, 2, \dots, N\}$ .

2. In the subset of  $q \in (\frac{k^i}{c^i}, \frac{k^{i+1}}{c^{i+1}}]$ ,  $\Pi_{bk}(q) = \{p - \frac{\sum_{j=i+1}^N c^j + \sum_{j=1}^i (1+r_f)c^j}{\bar{F}(q)}\} \cdot \mathbf{E}_{\mathbf{D}} \min(q, D)$  resembles  $\Pi_n(q)$ . The proof of concavity of  $\Pi_{bk}(q)$  follows the same argument in the proof of Lemma 3.

3. The proof follows two steps. First, for any  $\frac{k^i}{c^i} < a < b \leq \frac{k^{i+1}}{c^{i+1}}$ ,  $\frac{\partial_- \Pi_{bk}(q)}{\partial q}|_{q=a} > \frac{\partial_- \Pi_{bk}(q)}{\partial q}|_{q=b}$  because  $\Pi_{bk}$  is continuous and concave in each subset  $(\frac{k^i}{c^i}, \frac{k^{i+1}}{c^{i+1}}]$ , which has been proved in part (2). Second, we then show that if  $a = \frac{k^i}{c^i}$ , for any  $b$  such that  $a < b \leq \frac{k^{i+1}}{c^{i+1}}$ , then  $\frac{\partial_- \Pi_{bk}(q)}{\partial q}|_{q=a} > \frac{\partial_- \Pi_{bk}(q)}{\partial q}|_{q=b}$ . This result occurs because,

$$\begin{aligned} & \frac{\partial_- \Pi_{bk}(q)}{\partial q}|_{q=a} = \frac{\partial_- \Pi_{bk}(q)}{\partial q}|_{q=(\frac{k^i}{c^i})} \\ & = \left\{ -\frac{f(q)(\sum_{j=1}^N c^j + \sum_{j=1}^{i-1} r_f c^j)}{[\bar{F}(q)]^2} \int_0^q \bar{F}(x) dx + p\bar{F}(q) - \left( \sum_{j=1}^N c^j + \sum_{j=1}^{i-1} r_f c^j \right) \right\}|_{q=(\frac{k^i}{c^i})} \\ & \geq \left\{ -\frac{f(q)(\sum_{j=1}^N c^j + \sum_{j=1}^{i-1} r_f c^j)}{[\bar{F}(q)]^2} \int_0^q \bar{F}(x) dx + p\bar{F}(q) - \left( \sum_{j=1}^N c^j + \sum_{j=1}^{i-1} r_f c^j \right) \right\}|_{q=b} \\ & > \left\{ -\frac{f(q)(\sum_{j=1}^N c^j + \sum_{j=1}^i r_f c^j)}{[\bar{F}(q)]^2} \int_0^q \bar{F}(x) dx + p\bar{F}(q) - \left( \sum_{j=1}^N c^j + \sum_{j=1}^i r_f c^j \right) \right\}|_{q=b} \\ & = \frac{\partial_- \Pi_{bk}(q)}{\partial q}|_{q=b}. \end{aligned}$$

The first inequality follows from the concavity of  $\Pi_{bk}(q)$  in each subset  $q \in (\frac{k^i}{c^i}, \frac{k^{i+1}}{c^{i+1}}]$ . The second inequality holds because the summation upper limit is changed from  $i-1$  to  $i$  and  $r_f c^j \geq 0$ . To summarize,  $\Pi_{bk}(q)$  is globally left-differentiable and  $\frac{\partial_- \Pi_{bk}(q)}{\partial q}$  is globally decreasing in  $q$ . Q.E.D.

**Proof of Theorem 2:** By definition of  $b_k$ ,  $\Pi_{bk}(q)$  decreases in  $q$  for  $q \in (b_k, \infty)$  since  $\frac{\partial_- \Pi_{bk}(q)}{\partial q}$  is decreasing in  $q$  (Theorem 1). Hence  $q_{bk}^* \leq b_k$ . Also,  $\frac{\partial_- \Pi_{bk}(q)}{\partial q} > 0$  for  $q \in [0, \max_i \{ \frac{k^i}{c^i} \}|_{\frac{k^i}{c^i} < b_k}]$ , implying

that  $q_{bk}^*$  can not be any internal point of the interval  $(\frac{k^{i-1}}{c^{i-1}}, \frac{k^i}{c^i}] \forall i$  such that  $\frac{k^i}{c^i} < b_k$ . Therefore,  $q_{bk}^*$  can be obtained by comparing  $\Pi_{bk}(q)$  at  $q = \frac{k^i}{c^i}$  for  $\forall i$  such that  $\frac{k^i}{c^i} < b_k$  and  $\Pi_{bk}(q)$  at  $q = \bar{q}$  where  $\bar{q}$  lies in the interval that includes  $b_k$  and  $\frac{\partial \Pi_{bk}(q)}{\partial q} \Big|_{q=\bar{q}} = 0$ . Q.E.D.

**Proof of the sensitivity results in bank finance:**

(1) To prove  $q_{bk}^*$  decreases in  $c^i$  and in  $r_f$  but increases in  $p$ , we show that  $\Pi_{bk}(q, c^i)$  is a submodular function in  $(q, c^i)$ , a submodular function in  $(q, r_f)$ , and a supermodular function in  $(q, p)$ , respectively. To prove that  $\Pi_{bk}(q, c^i)$  is submodular in  $(q, c^i)$ , we can show that  $\Pi_{bk}(q, c^i) - \Pi_{bk}(q, c^{i'})$  is decreasing in  $q$  for  $c^i \geq c^{i'}$ . For a borrowing supplier  $i$ ,  $\Pi_{bk}(q, c^i) - \Pi_{bk}(q, c^{i'}) = -(c^i - c^{i'})(1 + r_f) \cdot \frac{\mathbf{E}_D[\min(q, D)]}{F(q)}$  is decreasing in  $q$  since  $\frac{\mathbf{E}_D[\min(q, D)]}{F(q)}$  is increasing in  $q$ . For a non-borrowing supplier  $i$ ,  $\Pi_{bk}(q, c^i) - \Pi_{bk}(q, c^{i'}) = -(c^i - c^{i'}) \cdot \frac{\mathbf{E}_D[\min(q, D)]}{F(q)}$ , which decreases in  $q$ . Following a similar argument, we can show that  $\Pi_{bk}(q, r_f)$  is submodular in  $(q, r_f)$  and  $\Pi_{bk}(q, p)$  is supermodular in  $(q, p)$ . Note that  $\forall q$ ,  $\frac{\partial \Pi_{bk}(q)}{\partial c^i} < 0$ ,  $\frac{\partial \Pi_{bk}(q)}{\partial r_f} < 0$ , and  $\frac{\partial \Pi_{bk}(q)}{\partial p} > 0$ . By Envelope Theorem, we have  $\Pi_{bk}(q_{bk}^*)$  decreases in  $c^i$  and  $r_f$  and increases in  $p$ .

(2) We next prove  $\Pi_{bk}(q_{bk}^*)$  is increasing in  $k^i, \forall i \in \{1, 2, \dots, N\}$ . Suppose  $k^{i'} < k^{i''}$ , Let  $q_{bk}^*$  and  $q_{bk}^{''*}$  denote the equilibrium production quantity when  $k^i = k^{i'}$  and  $k^i = k^{i''}$ , respectively. It follows from Eq.(5) that  $\Pi_{bk}(q, k^i)$  increases in  $k^i$  for any  $q$ . Therefore,  $\Pi_{bk}(q_{bk}^*, k^i = k^{i''}) \geq \Pi_{bk}(q_{bk}^*, k^i = k^{i'})$ . By optimality,  $\Pi_{bk}(q_{bk}^{''*}, k^i = k^{i''}) \geq \Pi_{bk}(q_{bk}^*, k^i = k^{i''}) \geq \Pi_{bk}(q_{bk}^*, k^i = k^{i'})$ . Q.E.D.

**Lemma 7** Suppose a non-negative random variable  $D$  has a density function,  $f(x)$ , with a support of  $[A, B]$ , where  $A \geq 0$  and  $B$  can be  $\infty$ . If  $\{x \in (A, \alpha) : f(x) \text{ is continuous and } f(x) > 0\} \neq \emptyset$  for  $\forall \alpha \in (A, B)$ , then  $\frac{\mathbf{E}_D \min(q, D)}{F(q)} - q > 0$  for any positive  $q \geq A$ .

**Proof of Lemma 7:** Note  $q - \frac{\mathbf{E}_D \min(q, D)}{F(q)} = \frac{1}{F(q)} [q\bar{F}(q) - \int_0^q \bar{F}(x) dx]$ . To prove  $\frac{\mathbf{E}_D \min(q, D)}{F(q)} - q > 0$ , we can instead show  $\int_0^q \bar{F}(x) dx > q\bar{F}(q)$ . If there exists  $\epsilon \in (A, \alpha) \subset (A, q)$ , such that  $f(x) > 0$  and is continuous in  $x$  for  $x \in [\epsilon - \lambda, \epsilon + \lambda]$  for any small  $\lambda > 0$ . We can then show  $\bar{F}(\epsilon) = \bar{F}(\epsilon + \lambda) + (\bar{F}(\epsilon) - \bar{F}(\epsilon + \lambda)) = \bar{F}(\epsilon + \lambda) + \int_{\epsilon}^{\epsilon + \lambda} f(x) dx > \bar{F}(\epsilon + \lambda)$ . The last inequality holds because  $\int_{\epsilon}^{\epsilon + \lambda} f(x) dx = \lambda f(\xi) > 0$ , where  $\xi \in (\epsilon, \epsilon + \lambda)$ . We thus have  $\bar{F}(\epsilon) > \bar{F}(\epsilon + \lambda) \geq \bar{F}(q)$ . We can then show  $\int_0^q \bar{F}(x) dx = \int_0^{\epsilon} \bar{F}(x) dx + \int_{\epsilon}^q \bar{F}(x) dx \geq \epsilon \bar{F}(\epsilon) + (q - \epsilon) \bar{F}(q) = \epsilon(\bar{F}(\epsilon) - \bar{F}(q)) + q\bar{F}(q) > q\bar{F}(q)$ , where the first inequality holds because  $\bar{F}(x)$  is nonincreasing. Note that if  $f(x)$  is IFR, the conditions in this lemma is satisfied. Q.E.D.

**Lemma 8** If the distribution of  $D$  is IFR,  $\frac{\mathbf{E}_D \min(q, D)}{F(q)} - q$  is strictly increasing convex in  $q$ .

**Proof of Lemma 8:** Note  $\partial[\frac{\mathbf{E}_D[\min(q,D)]}{F(q)} - q]/\partial q = \frac{f(q)}{[F(q)]^2} \mathbf{E}_D[\min(q,D)] \geq 0$  and strictly increases in  $q$ . Therefore,  $\frac{\mathbf{E}_D[\min(q,D)]}{F(q)} - q$  is strictly increasing convex in  $q$ . Q.E.D.

**Proof of Corollary 1:** Note that  $q_{bk}^* \geq \min_i \{\frac{k^i}{c^i}\} \geq q_n^*$ . We have  $\Pi_{bk}(q_{bk}^*) \geq \Pi_{bk}(q_n^*) = \Pi_n(q_n^*)$ , i.e., the assembler is better off under bank finance than under no finance. (1) The profits of a borrowing supplier  $i$  under bank finance and no finance are  $\pi_{bk}^i(q_{bk}^*) = c^i \cdot (1 + r_f)(\frac{\mathbf{E}_D[\min(q_{bk}^*, D)]}{F(q_{bk}^*)} - q_{bk}^*) + (r_f - r_s^i)k^i$  and  $\pi_n^i(q_n^*) = c^i \cdot (1 + r_s^i)(\frac{\mathbf{E}_D[\min(q_n^*, D)]}{F(q_n^*)} - q_n^*)$ , respectively. To compare  $\pi_{bk}^i(q_{bk}^*)$  with  $\pi_n^i(q_n^*)$ , note that  $\frac{\mathbf{E}_D[\min(q,D)]}{F(q)} - q > 0$  (Lemma 7) and increases in  $q$  (Lemma 8). Given  $q_{bk}^* \geq \min_i \{\frac{k^i}{c^i}\} \geq q_n^*$  and  $r_f \geq r_s^i$ , we have  $\pi_{bk}^i(q_{bk}^*) \geq \pi_n^i(q_n^*)$ . (2) For any non-borrowing supplier  $j$ , its profits under bank finance and no finance are,  $\pi_{bk}^j(q_{bk}^*) = c^j \cdot (1 + r_s^j)(\frac{\mathbf{E}_D[\min(q_{bk}^*, D)]}{F(q_{bk}^*)} - q_{bk}^*)$  and  $\pi_n^j(q_n^*) = c^j \cdot (1 + r_s^j)(\frac{\mathbf{E}_D[\min(q_n^*, D)]}{F(q_n^*)} - q_n^*)$ , respectively. Following Lemma 7 and Lemma 8, we have  $\pi_{bk}^j(q_{bk}^*) \geq \pi_n^j(q_n^*)$ .

We next show the equilibrium solution under bank finance is strictly Pareto better than that under no finance if  $q_{bk}^* > \min_i \{\frac{k^i}{c^i}\}$ . Note that when  $q_{bk}^* > \min_i \{\frac{k^i}{c^i}\}$ ,  $q_{bk}^* > q_n^*$ . We have  $\pi_{bk}^i(q_{bk}^*) > \pi_n^i(q_n^*)$  for any borrowing supplier  $i$  in part (1), and  $\pi_{bk}^j(q_{bk}^*) > \pi_n^j(q_n^*)$  for any non-borrowing supplier  $j$  in part (2). Therefore, the result is true. Q.E.D.

**Proof of Lemma 6:** The proof follows the same argument for Lemma 2. Q.E.D.

**Proof of Theorem 3:** Rearranging the terms in  $\Pi_{br}(r_b)$ , we have  $\Pi_{br}(r_b) = \sum_{i=1}^j [(c^i q - k^i) - \frac{c^i}{F(q)} \cdot \mathbf{E}_D[\min(q, D)]] \cdot (r_b - r_s^i) + (p - \frac{\sum_{i=1}^N c^i(1+r_s^i)}{F(q)}) \cdot \mathbf{E}_D[\min(q, D)] - \sum_{i=1}^j (r_a - r_s^i)(c^i q - k^i)$ . Hence for any  $q$ ,  $\partial \Pi_{br}(r_b)/\partial r_b = \sum_{i=1}^j (c^i q - k^i) - \frac{\mathbf{E}_D[\min(q, D)]}{F(q)} \cdot \sum_{i=1}^j c^i < 0$ , where the last inequality holds because  $q - \frac{\mathbf{E}_D[\min(q, D)]}{F(q)} - \frac{k^i}{c^i} < 0$  (Lemma 7). Therefore,  $\Pi_{br}(r_b)$  is decreasing in  $r_b$  for any  $q$ . Because  $r_b \geq r_s^i, \forall i \in \{1, 2, \dots, N\}$ , we have  $r_b^* = \max_i \{r_s^i\}$ . Q.E.D.

**Proof of Corollary 2:** Given  $r^i = r_a, \forall i \in \{1, 2, \dots, N\}$ , substituting  $r_b^* = \max_i \{r_s^i\}$  into  $\Pi_{br}(q, r_b^*)$ , we have  $\Pi_{br}(q, r_b^*) = \mathbf{E}_D(p - \frac{\sum_{i=1}^N c^i(1+r_s^i)}{F(q)}) \cdot \min(q, D)$ , which is concave in  $q$  by Lemma 3. Hence  $q_{br}^*$  is uniquely solved from  $p\bar{F}(q) = \sum_{i=1}^N c^i(1+r_s^i)(\frac{f(q)}{[F(q)]^2} \int_0^q \bar{F}(x)dx + 1)$ . Q.E.D.

**Proof of the sensitivity results in buyer finance:**

To prove  $q_{br}^*$  strictly decreases with  $c^i$ , we can show  $\Pi_{br}(q, c^i) - \Pi_{br}(q, c^{i'})$  is strictly decreasing in  $q$  for  $c^i > c^{i'}$ . For a borrowing supplier  $i$ ,  $\Pi_{br}(q, c^i) - \Pi_{br}(q, c^{i'}) = (c^i - c^{i'}) \cdot [-r_a q - \frac{\mathbf{E}_D[\min(q, D)]}{F(q)} + r_b(q - \frac{\mathbf{E}_D[\min(q, D)]}{F(q)})]$ , where in the square brackets the first term strictly decreases in  $q$  and both the second and third terms decrease in  $q$  by Lemma 8. Hence  $\Pi_{br}(q, c^i) - \Pi_{br}(q, c^{i'})$  is strictly decreasing in  $q$ . For a non-borrowing supplier  $j$ ,  $\Pi_{br}(q, c^j) - \Pi_{br}(q, c^{j'}) = -(c^j - c^{j'}) \cdot \frac{\mathbf{E}_D[\min(q, D)]}{F(q)}$ , which strictly decreases in  $q$  because  $\frac{\mathbf{E}_D[\min(q, D)]}{F(q)}$  strictly increases in  $q$ . To prove  $q_{br}^*$  strictly decreases in  $r_a$ , we

can show that for  $r_a^{(1)} > r_a^{(2)}$ ,  $\Pi_{br}(q, r_a = r_a^{(1)}) - \Pi_{br}(q, r_a = r_a^{(2)}) = (r_a^{(2)} - r_a^{(1)}) \cdot \sum_{i=1}^N \delta(c^i q - k^i) \cdot (c^i q - k^i)$  is strictly decreasing in  $q$  because  $\sum_{i=1}^N \delta(c^i q - k^i) \cdot (c^i q - k^i)$  is strictly increasing in  $q$ ,  $\forall q \in (\min_i \{\frac{k^i}{c^i}\}, \infty)$ . Following a similar argument, we can show that  $q_{br}^*$  strictly increases in  $p$ . The optimal value  $\Pi_{br}(q_{br}^*)$  increases in  $p$ , decreases in  $c^i$ , and decreases with  $r_a$  because  $\Pi_{br}(q_{br})$  increases in  $p$ , decreases in  $c^i$ , and decreases with  $r_a$  for any  $q$ .

**Proof of Corollary 3:**

When  $\max_i \{r_s^i\} \leq r_a$ , following similar argument in part (2) of the proof for the sensitivity in bank finance, we can show that  $\Pi_{br}(q_{br}^*)$  increases in  $k^i$ . When  $\max_i \{r_s^i\} > r_a$ , we introduce a special case: if all  $r_s^i, i \in \{1, 2, \dots, N\}$ , are the same,  $\Pi_{br} = (p - \frac{\sum_{i=1}^N c^i (1+r_s^i)}{F(q)}) \mathbf{E}_D[\min D, q] + \sum_{i=1}^N (\max_i \{r_s^i\} - r_a) (c^i q - k^i)^+$ , which decreases in  $k^i$ ; hence,  $\Pi_{br}(q_{br}^*)$  decreases in  $k^i$ . Q.E.D.

**Proof of Corollary 4:** The proof follows the same argument for Corollary 1.

**Proof of Theorem 4:** By Theorem 3, the optimal interest rate in buyer finance is  $r_b^* = \max_i \{r_s^i\}$  for any given  $q$ . Define  $h(q) = \Pi_{br}(q, r_b = r_b^*) - \Pi_{bk}(q)$ . We have  $h(q) = (r_f - \max_i \{r_s^i\}) \frac{\mathbf{E}_D \min(q, D)}{F(q)} \sum_{i=1}^j c^i - (r_a - \max_i \{r_s^i\}) \sum_{i=1}^j (c^i q - k^i)$ . If  $r_a \leq r_f$ , we have  $h(q) \geq (r_f - \max_i \{r_s^i\}) [\frac{\mathbf{E}_D \min(q, D)}{F(q)} \sum_{i=1}^j c^i - \sum_{i=1}^j (c^i q - k^i)]$ . Note that  $r_f > r_s^i$  and  $\frac{\mathbf{E}_D \min(q, D)}{F(q)} \sum_{i=1}^j c^i - \sum_{i=1}^j (c^i q - k^i) = (\frac{\mathbf{E}_D \min(q, D)}{F(q)} - q) \sum_{i=1}^j c^i + \sum_{i=1}^j k^i > 0$  (using Lemma 7) imply  $h(q) > 0, \forall q \geq 0$ . Therefore, we have  $\Pi_{br}(q_{br}^*) \geq \Pi_{br}(q_{bk}^*) > \Pi_{bk}(q_{bk}^*)$  when  $r_a \leq r_f$ . Note  $\Pi_{bk}(q_{bk}^*)$  is not related to  $r_a$  and  $\Pi_{br}(q_{br}^*)$  decreases in  $r_a$  because  $\frac{\partial \Pi_{br}(q_{br}, r_a)}{\partial r_a} = -\sum_{i=1}^j (c^i q - k^i)^+ \leq 0$ . We define  $\bar{r}$  as the value of  $r_a$  such that  $\Pi_{br}(q_{br}^*) = \Pi_{bk}(q_{bk}^*)$ . Next if we show that there is a sufficient large  $r_a$  such that  $\Pi_{br}(q_{br}^*) \leq \Pi_{bk}(q_{bk}^*)$ , then  $\bar{r}$  exists. Moreover,  $\bar{r} \geq r_f$  because we have shown that  $\Pi_{br}(q_{br}^*) > \Pi_{bk}(q_{bk}^*)$  when  $r_a \leq r_f$ .

Let  $r_a^0 = \frac{p}{c^1} + \max_i \{r_s^i\}$ . Suppose when  $r_a = r_a^0, q_{br}^* = \min_i \{k^i / c^i\} + \Delta^j$  for some  $\Delta^j \geq 0$  and suppliers  $i = 1, 2, \dots, j$ , borrow. Recall Eq. (8), we have  $\Pi_{br}(q = \min_i \{k^i / c^i\} + \Delta^j) - \Pi_{br}(q = \min_i \{k^i / c^i\}) \leq p \Delta^j + (r_b - r_a) \Delta^j \sum_{i=1}^j \cdot c^i = \Delta^j (p + (\max_i \{r_s^i\} - (\frac{p}{c^1} + \max_i \{r_s^i\})) \cdot \sum_{i=1}^j \cdot c^i) = \Delta^j (p - (1 - \frac{\sum_{i=1}^j c^i}{c^1})) \leq 0$ . Therefore,  $q_{br}^* \leq \min_i \{k^i / c^i\}$ , and thus we have  $\Pi_{br}(q_{br}^*) = \Pi_n(q_n^*) \leq \Pi_{bk}(q_{bk}^*)$ , where the last inequality follows from Corollary 1. Q.E.D.

**Proof of Corollary 5:**

Follow the proof of Theorem 4, there exists  $r_a = \bar{r}$  such that  $\Pi_{br}(q_{bk}^*)|_{r_a=\bar{r}} = \Pi_{bk}(q_{bk}^*)$ , where  $\bar{r} = \frac{(r_f - \max_i \{r_s^i\}) \cdot \mathbf{E}_D \min(q_{bk}^*, D)}{\bar{F}(q_{bk}^*)(q_{bk}^* - \frac{\sum_{i=1}^j k^i}{\sum_{i=1}^j c^i})} + \max_i \{r_s^i\}$ , and  $J = \{i : c^i q_{bk}^* > k^i\}$ . Substituting  $r = \bar{r}$  and  $q = q_{bk}^*$  into  $\Pi_{br}(q)$ , we have  $\Pi_{br}^*(q_{br}^*)|_{r_a=\bar{r}} \geq \Pi_{br}(q_{bk}^*)|_{r_a=\bar{r}} = \Pi_{bk}(q_{bk}^*)$ . Because  $\Pi_{br}^*(q_{br}^*)$  decreases in  $r_a$  (proved in Theorem 4), recall the definition of  $\bar{r}$ , we then have  $\bar{r} \leq \bar{r}$ .

We next show  $\bar{r} = \bar{r}$  if  $\max_i \{r_s^i\} = r_f$ . Following the proof of Theorem 4,  $\bar{r} = r_f$  if  $r_f = \max_i \{r_s^i\}$ . Substitute  $r_f = \max_i \{r_s^i\}$  into the expression of  $\bar{r}$ , we have  $\bar{r} = r_f$ . Therefore, we have  $\bar{r} = \bar{r}$ . Q.E.D.

**Proof of Corollary 6:** When  $\frac{k^i}{c^i} = \frac{k^j}{c^j} \forall i, j = 1, 2, \dots, N$  and  $\frac{k^i}{c^i} < q_{bk}^*$ , the equilibrium quantity  $q_{bk}^*$  and  $q_{br}^*$  satisfy the following first-order conditions, respectively,

$$\frac{p\bar{F}(q_{bk}^*)}{\sum_{i=1}^N c^i} = (1 + r_f) + \frac{f(q_{bk}^*)(1 + r_f)\mathbf{E}_{\mathbf{D}}\min(q_{bk}^*, D)}{[\bar{F}(q_{bk}^*)]^2}, \quad (\text{A-1})$$

$$\frac{p\bar{F}(q_{br}^*)}{\sum_{i=1}^N c^i} = (1 + r_a) + \frac{f(q_{br}^*)(1 + \max_i \{r_s^i\})\mathbf{E}_{\mathbf{D}}\min(q_{br}^*, D)}{[\bar{F}(q_{br}^*)]^2}. \quad (\text{A-2})$$

Since  $\Pi_{br}(q_{br})$  decreases with  $r_a$ ,  $\Pi_{br}(q_{br}^*)$  decreases with  $r_a$ . Let  $r_a = \bar{r}$  such that  $\Pi_{br}(q_{br}^*) = \Pi_{bk}(q_{bk}^*)$ , we have  $\bar{r} = \frac{[p - \frac{\sum_{i=1}^N c^i(1 + \max_i \{r_s^i\})}{\bar{F}(q_{br}^*)}]\mathbf{E}_{\mathbf{D}}\min(q_{br}^*, D) - \Pi_{bk}(q_{bk}^*)}{\sum_{i=1}^N (c^i q_{br}^* - k^i)} + \max_i \{r_s^i\}$ .

1. Suppose  $\sum_{i=1}^N k^i = K$ , by Theorem 4, there exists  $r_a = \bar{r} > r_f$  such that  $\Pi_{br}(q = q_{br}^*, r_a = \bar{r}, \sum_{i=1}^N k^i = K) = \Pi_{bk}(q_{bk}^*)$ . By Eq. (A-1) and Eq. (A-2), both  $q_{bk}^*$  and  $q_{br}^*$  are independent of  $k^i, \forall i \in \{1, 2, \dots, N\}$ . Then  $\forall K' > K$ , there is  $\Pi_{br}(q = q_{br}^*, r_a = \bar{r}, \sum_{i=1}^N k^i = K') - \Pi_{bk}(q_{bk}^*) = (\bar{r} - \max_i \{r_s^i\})(K' - K) > 0$ . Since  $\Pi_{br}(q_{br}^*)$  decreases with  $r_a$ , there exists  $\bar{r}' > \bar{r}$  such that  $\Pi_{br}(q = q_{br}^*, r_a = \bar{r}', \sum_{i=1}^N k^i = K') - \Pi_{bk}(q_{bk}^*) = 0$ . Therefore,  $\bar{r}$  increases in  $\sum_{i=1}^N k^i$ .

2. Similarly to item 1, we can prove that  $\bar{r}$  decreases in  $\max_i \{r_s^i\}$ .

3. By Eq. (A-1) and (A-2), both  $q_{bk}^*$  and  $q_{br}^*$  are independent of  $k^i, \forall i \in \{1, 2, \dots, N\}$ . Therefore,  $\Pi_{bk}(q_{bk}^*) = [p - \frac{\sum_{i=1}^N c^i(1 + r_f)}{\bar{F}(q_{bk}^*)}]\mathbf{E}_{\mathbf{D}}\min(q_{bk}^*, D)$  is independent of  $k^i$ , while  $\Pi_{br}(q_{br}^*) = [p - \frac{\sum_{i=1}^N c^i(1 + \max_i \{r_s^i\})}{\bar{F}(q_{br}^*)}]\mathbf{E}_{\mathbf{D}}\min(q_{br}^*, D) + (\max_i \{r_s^i\} - r_a)\sum_{i=1}^N (c^i q_{br}^* - k^i)$ , which increases in  $k^i$  if  $r_a \geq \max_i \{r_s^i\}$ . Hence,  $\Pi_{br}(q_{br}^*) - \Pi_{bk}(q_{bk}^*)$  increases in  $\sum_{i=1}^N k^i$  if  $r_a \geq \max_i \{r_s^i\}$ , decreases in  $\sum_{i=1}^N k^i$  if  $r_a < \max_i \{r_s^i\}$ . Q.E.D

**Proof of Theorem 5:**

1. Given  $r_s^1 = r_s^2 = r_s, c^1 = c^2 = \frac{C}{2}$ , there is  $\Pi_{br}(q, \theta) = (p - \frac{C(1+r_s) + \frac{C(r_f - r_s)}{2}[\delta(\frac{C}{2}q - \frac{\theta K}{1+\theta}) + \delta(\frac{C}{2}q - \frac{K}{1+\theta})]}{F(q)})\mathbf{E}_{\mathbf{D}}[\min(q, D)]$ , which depends on  $\theta$  only because the term  $\delta(\frac{C}{2}q - \frac{\theta K}{1+\theta}) + \delta(\frac{C}{2}q - \frac{K}{1+\theta})$  depends on  $\theta$ . Let  $I(q, \theta) = \delta(\frac{C}{2}q - \frac{\theta K}{1+\theta}) + \delta(\frac{C}{2}q - \frac{K}{1+\theta})$ , we focus on two scenarios: (1)  $K < Cq_{bk}^*$ . Since for  $\forall \theta \in (0, 1]$ , there is  $\delta(\frac{C}{2}q_{bk}^* - \frac{\theta K}{1+\theta}) = 1$  and  $\delta(\frac{C}{2}q_{bk}^* - \frac{K}{1+\theta})$  increases in  $\theta$ , thus  $I(q_{bk}^*, \theta)$  increases with  $\theta$ . Therefore,  $\Pi_{br}(q_{bk}^*, \theta)$  decreases in  $\theta$  when  $K < Cq_{bk}^*$ . (2)  $K \geq Cq_{bk}^*$ . In this scenario,  $\forall \theta \in (0, 1]$ , there is  $\delta(\frac{C}{2}q_{bk}^* - \frac{\theta K}{1+\theta})$  decreases in  $\theta$ , while  $\delta(\frac{C}{2}q_{bk}^* - \frac{K}{1+\theta}) = 0$ , hence we have  $I(q_{bk}^*, \theta)$  decreases with  $\theta$ , and  $\Pi_{br}(q_{bk}^*, \theta)$  increases in  $\theta$  when  $K \geq Cq_{bk}^*$ .

2. Note that we can prove  $\Pi_{br}^*(q_{br}^*, \theta)$  increases (decreases) in  $\theta$  if we have  $\Pi_{br}(q, \theta)$  increases (decreases) in  $\theta$ ,  $\forall q$ . Substitute  $r_b^* = \max_i \{r_s^i\}$  into  $\Pi_{br}(q)$ , then  $\Pi_{br}(q, \theta) = (p - \frac{\sum_{i=1}^2 c^i (1+r_s^i)}{F(q)}) \cdot \mathbf{E}_{\mathbf{D}}[\min(q, D)] + (\max_i \{r_s^i\} - r_a) \cdot ((c^1 q - \frac{\theta K}{1+\theta})^+ + (c^2 q - \frac{K}{1+\theta})^+)$ , where  $\theta \in (0, \frac{c^1}{c^2}]$ . We next only consider  $c^1 < c^2$  and  $\theta \in (0, \frac{c^1}{c^2}]$ , because if  $c^2 < c^1$  we can simply switch the supplier's index. Let  $B(q, \theta) = (c^1 q - \frac{\theta K}{1+\theta})^+ + (c^2 q - \frac{K}{1+\theta})^+$ , then  $\Pi_{br}(q, \theta) = (p - \frac{\sum_{i=1}^2 c^i (1+r_s^i)}{F(q)}) \cdot \mathbf{E}_{\mathbf{D}}[\min(q, D)] + (\max_i \{r_s^i\} - r_a) \cdot B(q, \theta)$ . We next show  $B(q, \theta)$  is monotone in  $\theta$  for given  $q$ . With  $\theta \in (0, \frac{c^1}{c^2}]$ ,  $B(q, \theta)$  lies in one of the following three cases: (a)  $B(q, \theta) = 0$ ; (b)  $B(q, \theta) = c^1 q - \frac{\theta K}{1+\theta}$ ; (c)  $B(q, \theta) = (c^1 + c^2)q - K$ ; For any  $0 < \theta_1 < \theta_2 \leq \frac{c^1}{c^2}$ , it is then easy to verify that  $B(q, \theta_2) - B(q, \theta_1) \leq 0$ , hence  $B(q, \theta)$  decreases in  $\theta$ . Therefore,  $\Pi_{br}(q, \theta)$  increases in  $\theta$  if  $r_a \geq \max_i r_s^i$ , but decreases in  $\theta$  if  $r_a < \max_i r_s^i$ . Q.E.D.

**Proof of Corollary 7:** Let  $C = \sum_{i=1}^N c^i$ . When  $\sum_{i=1}^N k^i = 0$ ,  $\bar{r} = \frac{(r_f - \max_i \{r_s^i\}) \cdot \mathbf{E}_{\mathbf{D}}[\min(q_{bk}^*, D)]}{F(q_{bk}^*) q_{bk}^*} + \max_i \{r_s^i\} \cdot \frac{\partial^2 \Pi_{bk}}{\partial q \partial C} = -(1 + r_f)[1 + \frac{f(q) \int_0^q \bar{F}(x) dx}{(F(q))^2}] < 0$ , hence  $q_{bk}^*$  decreases in  $C$ . It turns out that if we can show  $G(q) = \frac{\int_0^q \bar{F}(x) dx}{q F(q)}$  increases in  $q$ , then we have  $\bar{r}$  decreases in  $C$ .  $G'(q) = \frac{\partial G(q)}{\partial q} = \frac{q \bar{F}(q) - (1 - \frac{q f(q)}{F(q)}) \int_0^q \bar{F}(x) dx}{q^2 \cdot F(q)} = \frac{q \bar{F}(q) + (z(q) - 1) \int_0^q \bar{F}(x) dx}{q^2 \cdot F(q)}$ , where  $z(q) = \frac{q f(q)}{F(q)}$ . Note  $z'(q) > 0$  because demand distribution follows IFR property, let  $B(q) = q \bar{F}(q) + (z(q) - 1) \int_0^q \bar{F}(x) dx$ , then  $B'(q) = z'(q) \int_0^q \bar{F}(x) dx > 0$ . Because  $\forall q \in (-\infty, 0)$ ,  $B(q) = 0$  and  $B(q)$  is continuous in  $q$ , then we have  $B(q) \geq 0$  and thus  $G(q)$  is increasing in  $q$ . Q.E.D

### Proof of Theorem 6

1. When  $N = 2$ ,  $k^1 = k^2 = K/2$ ,  $r_s^1 = r_s^2 = r_s$  and  $\eta = \frac{c^1}{c^2} \in [0, 1]$ , we have  $\Pi_{bk}(q, \eta) = (p - \frac{C[(1+r_s) + \frac{1}{1+\eta}(r_f - r_s)] \cdot \delta(\frac{C}{1+\eta}q - K/2) + \frac{\eta}{1+\eta}(r_f - r_s) \cdot \delta(\frac{\eta C}{1+\eta}q - K/2)}{F(q)}) \cdot \mathbf{E}_{\mathbf{D}}[\min(q, D)]$ . Therefore,  $\Pi_{bk}(q, \eta)$  depends on only  $\eta$ , because the term  $\frac{\delta(\frac{C}{1+\eta}q - K/2)}{1+\eta} + \frac{\eta \delta(\frac{\eta C}{1+\eta}q - K/2)}{1+\eta}$  depends on  $\eta$ . Let  $M(\eta) = \frac{\delta(\frac{C}{1+\eta}q - K/2)}{1+\eta} + \frac{\eta \delta(\frac{\eta C}{1+\eta}q - K/2)}{1+\eta}$ . We then focus on two cases: (1)  $K \geq C q_{bk}^*$ . In this case,  $M(\eta)$  decreases with  $\eta$ , and achieves its minimum at  $\eta = 1$  because  $\frac{k^1}{c^1} = \frac{k^2}{c^2} \geq q_{bk}^*$  and  $\{\delta(\frac{C}{1+\eta}q - K/2)\}_{\eta=1} = \{\delta(\frac{\eta C}{1+\eta}q - K/2)\}_{\eta=1} = 0, \forall q \in [0, q_{bk}^*]$ . Hence for  $\eta \in [0, 1]$  and  $\forall q \in [0, q_{bk}^*]$ ,  $\Pi_{bk}(q, \eta)$  increases in  $\eta$ . (2)  $K < C q_{bk}^*$ . In this case, when  $q = q_{bk}^*$ ,  $M(\eta)$  achieves its maximum at  $\eta = 1$  because  $\frac{k^1}{c^1} = \frac{k^2}{c^2} < q_{bk}^*$  and  $\{\delta(\frac{C}{1+\eta}q_{bk}^* - K/2)\}_{\eta=1} = \{\delta(\frac{\eta C}{1+\eta}q_{bk}^* - K/2)\}_{\eta=1} = 1$ . Since  $\delta(\frac{C}{1+\eta}q_{bk}^* - K/2) \geq \delta(\frac{\eta C}{1+\eta}q_{bk}^* - K/2)$ , there exists  $0 < \bar{\eta} \leq 1$  such that  $\delta(\frac{C}{1+\bar{\eta}}q_{bk}^* - K/2) = 1, \delta(\frac{\eta C}{1+\bar{\eta}}q_{bk}^* - K/2) = 0$  when  $\eta \in (0, \bar{\eta}]$  and  $\delta(\frac{C}{1+\eta}q_{bk}^* - K/2) = 1, \delta(\frac{\eta C}{1+\eta}q_{bk}^* - K/2) = 1$  for  $\eta \in (\bar{\eta}, 1]$ . Therefore,  $M(\eta) = \frac{1}{1+\eta}$  for  $\eta \in (0, \bar{\eta}]$ , and  $M(\eta) = 1$  for  $\eta \in (\bar{\eta}, 1]$ . Hence  $M(\eta)$  first decreases and then increases in  $\eta$ , while  $\Pi_{bk}(q_{bk}^*, \eta)$  first increases and then decreases in  $\eta$ .

2. The proof of part 2 resembles the proof of part 2 of Theorem 5 and thus omitted. Q.E.D

**Proof of Theorem 7:** The proof of Theorem 8 (provided in the latter part of this appendix) shows that  $q_{br}^* \geq q_{bk}^*$  if and only if  $r_a \leq \hat{r}$ , where  $\hat{r} \geq r_f$ . We next prove non-borrowing suppliers prefer buyer finance if and only if  $r_a \leq \hat{r}$ .

Note that  $q_{bk}^* = \bar{F}^{-1}\left(\frac{c^i \cdot (1+r_s^i + (r_f - r_s^i) \cdot \delta(c^i q_{bk}^* - k^i))}{w_i^*}\right)$ , and  $q_{br}^* = \bar{F}^{-1}\left(\frac{c^i \cdot (1+r_s^i + (r_b^* - r_s^i) \cdot \delta(c^i q_{br}^* - k^i))}{w_i^*}\right)$ . For a non-borrowing supplier  $i$ ,  $\delta(c^i q_{br}^* - k^i) = 0$  and  $\delta(c^i q_{bk}^* - k^i) = 0$ . Its profits in bank and buyer financing are  $\pi_{bk}^i(q_{bk}^*) = \mathbf{E}_D[w_{bk}^{i*} \cdot \min(q_{bk}^*, D) - c^i(1+r_s^i)q_{bk}^*] = c^i \cdot (1+r_s^i) \left(\frac{\mathbf{E}_D(q_{bk}^*, D)}{F(q_{bk}^*)} - q_{bk}^*\right)$ , and  $\pi_{br}^i(q_{br}^*) = \mathbf{E}_D[w_{br}^{i*} \cdot \min(q_{br}^*, D) - c^i(1+r_s^i)q_{br}^*] = c^i \cdot (1+r_s^i) \left(\frac{\mathbf{E}_D \min(q_{br}^*, D)}{F(q_{br}^*)} - q_{br}^*\right)$ , respectively. Because  $\frac{\mathbf{E}_D \min(q, D)}{F(q)} - q$  is strictly increasing in  $q$  (Lemma 8) and Theorem 8, we have  $\pi_{bk}^i(q_{bk}^*) \leq \pi_{br}^i(q_{br}^*)$  if and only if  $r_a \leq \hat{r}$ .

For a borrowing supplier  $i$ ,  $\pi_{bk}^i(q_{bk}^*) = c^i \cdot (1+r_f) \left(\frac{\mathbf{E}_D(q_{bk}^*, D)}{F(q_{bk}^*)} - q_{bk}^*\right) + (r_f - r_s^i)k^i$  is independent of  $r_a$  because  $q_{bk}^*$  does not depend on  $r_a$ .  $\pi_{br}^i(q_{br}^*) = c^i \cdot (1 + \max_i \{r_s^i\}) \left(\frac{\mathbf{E}_D(q_{br}^*, D)}{F(q_{br}^*)} - q_{br}^*\right) + (\max_i \{r_s^i\} - r_s^i)k^i$  is decreasing in  $r_a$  because of Lemma 8 and  $q_{br}^* \downarrow r_a$  (by the proof for sensitivity results in buyer finance). Let  $\tilde{r}$  be the value of  $r_a$  such that  $\pi_{bk}^i(q_{bk}^*) = \pi_{br}^i(q_{br}^*)$ . If  $\tilde{r}$  exists, we have that if  $r_a \leq \tilde{r}$ ,  $\pi_{bk}^i(q_{bk}^*) \leq \pi_{br}^i(q_{br}^*)$ . Furthermore, we have  $\tilde{r} < \hat{r}$ . This is because when  $r_a = \hat{r}$ , we have  $q_{bk}^* = q_{br}^*$  (By Theorem 8). From the above expression of  $\pi_{bk}^i(q)$  and  $\pi_{br}^i(q)$  for borrowing supplier  $i$ , we have  $\pi_{bk}^i(q_{bk}^*) \geq \pi_{br}^i(q_{br}^*)$  because of  $r_f \geq \max_i \{r_s^i\}$ .

We next show the existence of  $\tilde{r}$ . Note that  $\pi_{br}(q_{br}^*)$  is convex increasing in  $q_{br}^*$  because of Lemma 8 and  $q_{br}^* \downarrow r_a$ . If  $r_a$  increases such that  $r_a > \hat{r}$ , then  $q_{br}^* < q_{bk}^*$ , and we have  $\pi_{br}^i(q_{br}^*) < \pi_{bk}^i(q_{bk}^*)$ . We next show that  $\pi_{br}^i(q_{br}^*) > \pi_{bk}^i(q_{bk}^*)$  if  $r_a$  goes below a value (possibly a negative value). Let  $\Pi'_{br}(q) = M(q) + \sum_{i=1}^N c^i \cdot \delta^i (\max_i \{r_s^i\} - r_a)$ , where  $M(q) = p\bar{F}(q) - \sum_{i=1}^N c^i (1 + r_s^i + (\max_i \{r_s^i\} - r_s^i) \cdot \delta^i) \cdot (1 + \frac{f(q)\mathbf{E}_D \min(q, D)}{(F(q))^2})$  and  $\delta^i = \delta(c^i q - k^i)$ . Let  $q = \bar{q}_{br}$  be the solution to  $c^i \cdot (1 + \max_i \{r_s^i\}) \left(\frac{\mathbf{E}_D(q, D)}{F(q)} - q\right) + (\max_i \{r_s^i\} - r_s^i)k^i = \pi_{bk}^i(q_{bk}^*)$ . Substitute  $q = \bar{q}_{br}$  into  $\Pi'_{br}(q)$ , we have, if  $r_a < \frac{M(\bar{q}_{br}) + \sum_{i=1}^N c^i \cdot \delta^i \max_i \{r_s^i\}}{\sum_{i=1}^N c^i \cdot \delta^i}$ , then  $\Pi'_{br}(q)|_{q=\bar{q}_{br}} > 0$  and hence  $q_{br}^* > \bar{q}_{br}$ . By the definition of  $\bar{q}_{br}$  and the above expression of  $\pi_{br}^i(q_{br}^*)$ , we have  $\pi_{br}^i(q_{br}^*) > [c^i \cdot (1 + \max_i \{r_s^i\}) \left(\frac{\mathbf{E}_D(q, D)}{F(q)} - q\right) + (\max_i \{r_s^i\} - r_s^i)k^i]|_{q=\bar{q}_{br}} = \pi_{bk}^i(q_{bk}^*)$ . Therefore,  $\tilde{r}$  exists. When  $\tilde{r}$  is negative, it means the borrowing always prefer bank finance when  $r_a$  is non-negative. Q.E.D.

**Proof of Theorem 8:** Consider  $h(q) = \Pi_{br}(q) - \Pi_{bk}(q)$  as defined in the proof for Theorem 4. Note that  $h(q) > 0, \forall q \geq 0$  if  $r_a \leq r_f$  and  $\sum_i k^i \geq 0$ . Moreover, if  $r_a \leq r_f$ ,  $h(q)$  is also increasing in  $q$  because we have  $h'(q) = [(r_f - \max_i \{r_s^i\}) \cdot (\frac{f(q) \cdot \mathbf{E}_D \min(q, D)}{(F(q))^2} + 1) - (r_a - \max_i \{r_s^i\})] \sum_i c^i > 0$ . If we show  $q_{br}^*$  cannot be in  $[0, q_{bk}^*)$ , then there must be  $q_{br}^* \geq q_{bk}^*$ . By the optimality of  $q_{bk}^*$ ,

$\Pi_{bk}(q) \leq \Pi_{bk}(q_{bk}^*)$  for any  $q \in [0, q_{bk}^*]$ . Furthermore, by the definition of  $h(q)$ ,  $\Pi_{br}(q) = \Pi_{bk}(q) + h(q) < \Pi_{bk}(q_{bk}^*) + h(q_{bk}^*) = \Pi_{br}(q_{bk}^*)$  for any  $q \in [0, q_{bk}^*]$ . That is,  $\Pi_{br}(q) < \Pi_{br}(q_{bk}^*)$  for any  $q \in [0, q_{bk}^*]$ , hence  $q_{br}^* \geq q_{bk}^*$ . Furthermore,  $\Pi'_{br}(q)|_{q=q_{bk}^*} = \Pi'_{bk}(q)|_{q=q_{bk}^*} + h'(q)|_{q=q_{bk}^*} = h'(q_{bk}^*) > 0$ . Therefore, we must have  $q_{br}^* > q_{bk}^*$  when  $r_a \leq r_f$ . Since  $q_{br}^*$  strictly decreases in  $r_a$ , we thus proved there exists  $\hat{r} \geq r_f$  such that  $q_{br}^* > q_{bk}^*$  if  $r_a < \hat{r}$ .

We next show that there exists a sufficient large  $r_a$  such that  $q_{br}^* \leq q_{bk}^*$ , which has been showed in the proof for Theorem 4, where we show  $\exists r_a = \frac{p}{c^i} + \max_i \{r_s^i\}$  such that  $q_{br}^* = q_n^* \leq q_{bk}^*$ .

For a centralized supply chain, the equilibrium production quantity  $q^{*cen} = \bar{F}^{-1}(\frac{\sum c^i(1+r_s^i)}{p})$ , we thus have  $q_{br}^* = \bar{F}^{-1}(\frac{\sum_{i=1}^N c^i \cdot (1+r_s^i + (r_b^* - r_s^i) \cdot \delta(c^i q_{br}^* - k^i))}{\sum_{i=1}^N w_i^*}) \leq \bar{F}^{-1}(\frac{\sum_{i=1}^N c^i(1+r_s^i)}{\sum_{i=1}^N w_i^*}) \leq q^{*cen}$ , where the last inequality holds because  $\sum_{i=1}^N w_i^* < p$ . Similarly, one can show  $q_{bk}^* \leq q^{*cen}$ . Q.E.D.

**Proof of Corollary 9:** When  $\frac{k^i}{c^i} = \frac{k^j}{c^j} \forall i, j = 1, 2, \dots, N$  and  $\frac{k^i}{c^i} < q_{bk}^*$ , the equilibrium quantity  $q_{bk}^*$  and  $q_{br}^*$ , respectively, are solved from Eq. (A-1) and Eq. (A-2). By Eq. (A-2),  $q_{br}^*$  decreases in  $r_a$ . Let  $\hat{r} = r_f + \frac{f(q_{bk}^*)(r_f - \max_i \{r_s^i\}) \cdot \mathbf{E}_{\mathbf{D} \min}(q_{bk}^*, D)}{[F(q_{bk}^*)]^2}$  and substitute  $r_a = \hat{r}$  into Eq. (A-2). We then have  $q_{br}^* = q_{bk}^*$ . Since  $q_{br}^*$  is monotonically decreasing in  $r_a$ , we have  $q_{br}^* \geq q_{bk}^*$  when  $r_a \leq \hat{r} = r_f + \frac{f(q_{bk}^*)(r_f - \max_i \{r_s^i\}) \cdot \mathbf{E}_{\mathbf{D} \min}(q_{bk}^*, D)}{[F(q_{bk}^*)]^2}$ .

1. From the above argument, when  $\frac{k^i}{c^i} = \frac{k^j}{c^j}, \forall i, j = 1, 2, \dots, N$ , and  $\frac{k^i}{c^i} < q_{bk}^*$ , the equilibrium quantity in bank finance  $q_{bk}^*$  does not depend on  $k^i, \forall i \in \{1, 2, \dots, N\}$ , hence,  $\hat{r} = r_f + \frac{f(q_{bk}^*)(r_f - \max_i \{r_s^i\}) \cdot \mathbf{E}_{\mathbf{D} \min}(q_{bk}^*, D)}{[F(q_{bk}^*)]^2}$ , which is also independent of  $k^i$  and  $\sum_{i=1}^N k^i$ .

2. We first show  $\hat{r} = r_f + \frac{f(q_{bk}^*)(r_f - \max_i \{r_s^i\}) \cdot \mathbf{E}_{\mathbf{D} \min}(q_{bk}^*, D)}{[F(q_{bk}^*)]^2}$  is increasing in  $q_{bk}^*$ , which is true since both  $\frac{f(q_{bk}^*)}{F(q_{bk}^*)}$  and  $\frac{\mathbf{E}_{\mathbf{D} \min}(q_{bk}^*, D)}{F(q_{bk}^*)}$  are increasing in  $q_{bk}^*$ . Note that  $\hat{r}$  depends on  $\sum_{i=1}^N c^i$  only because  $q_{bk}^*$  depends on  $\sum_{i=1}^N c^i$ , and by Eq. (A-1),  $q_{bk}^*$  decreases in  $\sum_{i=1}^N c^i$ . Therefore,  $\hat{r}$  decreases in  $\sum_{i=1}^N c^i$ .

3.  $\hat{r} = r_f + \frac{f(q_{bk}^*)(r_f - \max_i \{r_s^i\}) \cdot \mathbf{E}_{\mathbf{D} \min}(q_{bk}^*, D)}{[F(q_{bk}^*)]^2}$  decreases in  $\max_i \{r_s^i\}$  because  $q_{bk}^*$  is independent of  $\max_i \{r_s^i\}$ . Q.E.D.
